# Supplementary material for: Ring-Opening Metathesis Polymerization and Related Olefin Metathesis Reactions in Benzotrifluoride as an Environmentally Advantageous Medium
Source: MDPI journal article supplement (doi:10.3390/ijms24010671), 2022-12-30
Supplement: s1 [file s1]

# Supporting information

## Ring-Opening Metathesis Polymerization and Related Olefin Metathesis

### Reactions in Benzotrifluoride as an Environmentally Advantageous Medium

Ervin Kovács<sup>1\*</sup>, Bence Balterer<sup>2,3</sup>, Nguyen Anh Duc<sup>1</sup>, Györgyi Szarka<sup>1</sup>,

Michael C. Owen<sup>4</sup>, Attila Domján<sup>2,\*</sup> and Béla Iván<sup>1</sup>

<sup>1</sup>Polymer Chemistry and Physics Research Group, Institute of Materials and Environmental Chemistry, Research Centre for Natural Sciences, Magyar tudósok Krt. 2, H-1117 Budapest, Hungary

<sup>2</sup>NMR Research Laboratory, Centre for Structural Science, Research Centre for Natural Sciences, Magyar tudósok krt. 2, H-1117 Budapest, Hungary

<sup>3</sup>Hevesy György PhD School of Chemistry, Eötvös Loránd University, Pázmány sétány 1, H-1117 Budapest, Hungary

<sup>4</sup>Institute of Chemistry, University of Miskolc, H-3515 Miskolc-Egyetemváros, Hungary

\*Correspondence: domjan.attila@ttk.hu

† In memory of Professor Robert H. Grubbs.

## CONTENT

**Figure S1.** GPC traces of the polymers prepared by ROMP of norbornene in benzotrifluoride (left) and dichloromethane (right) using G1, G2 or HG2 catalyst at 25 °C.

**Figure S2.** Stacked <sup>1</sup>H NMR spectra of the ROMP of norbornene using 0.001 mol% of G2 catalyst in benzotrifluoride at 25 °C in every minute from 1 minute to 10 minutes.

**Figure S3.** Stacked <sup>1</sup>H NMR spectra of the ROMP of norbornene using 0.001 mol% of G2 catalyst in CD<sub>2</sub>Cl<sub>2</sub> at 25 °C in every two minutes from 1 minute to 39 minutes.

**Figure S4.** Stacked <sup>1</sup>H NMR spectra of the RCM reaction of diethyl diallylmalonate using 1 mol% G2 catalyst in benzotrifluoride at 25 °C in every six minutes.

**Figure S5.** Stacked <sup>1</sup>H NMR spectra of isomerization reaction of (Z)-but-2-ene-1,4-diyl diacetate using 0.001 equivalent of G2 catalyst in benzotrifluoride in every six minutes.

**Table S1.** The solvent, the atmosphere,<sup>S1</sup> the catalyst type, the conversion and the turnover number for ROMP of norbornene conducted in benzotrifluoride at various conditions using 2 ppm catalyst at room temperature for 78 hours.

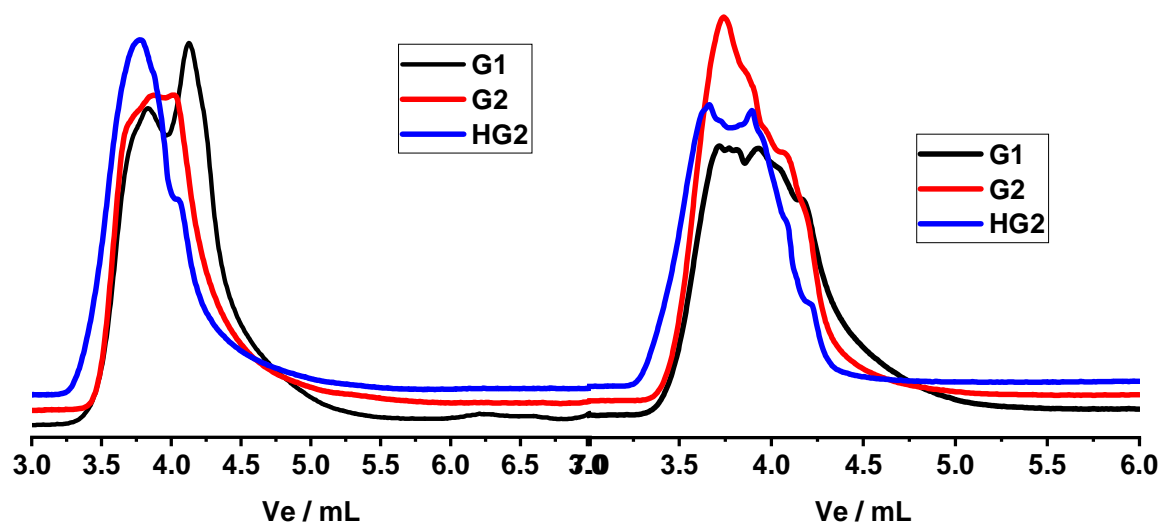

**Figure S1.** GPC traces of the polymers prepared by ROMP of norbornene in benzotrifluoride (left) and dichloromethane (right) using G1, G2 or HG2 catalyst at 25 °C. GPC measurements were carried out in THF at 35 °C.

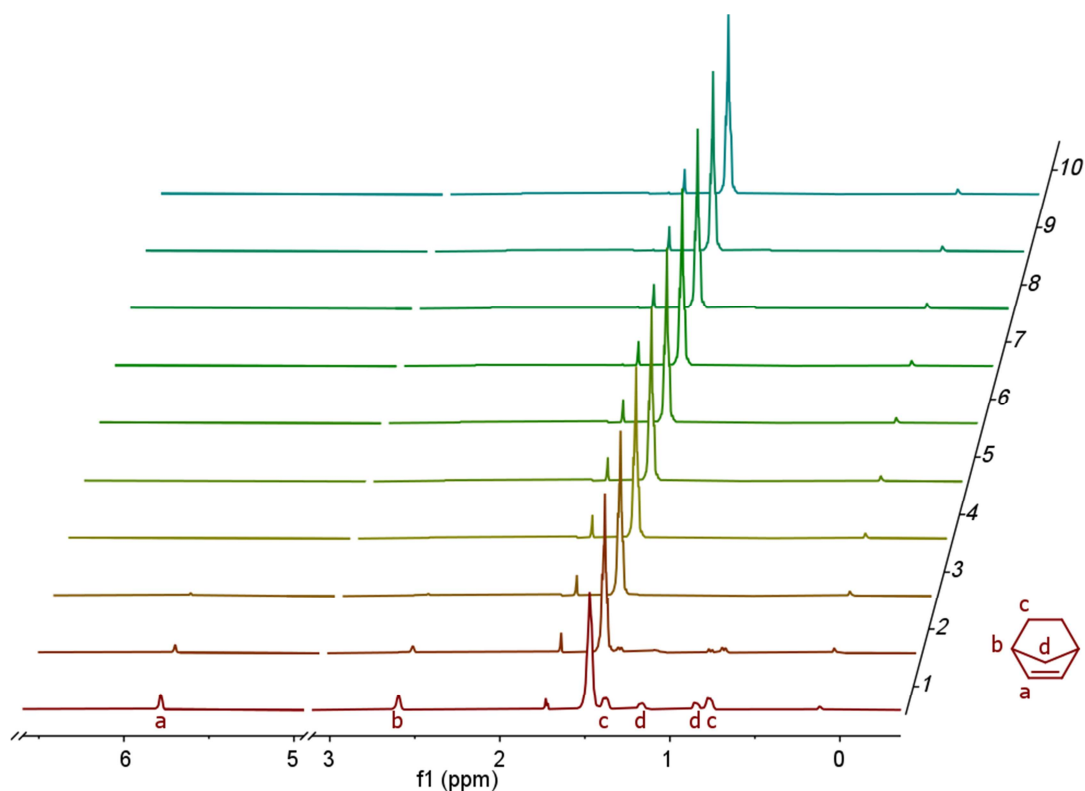

**Figure S2.** Stacked  $^1\text{H}$  NMR spectra of the ring-opening metathesis polymerization reaction of norbornene ( $c_0 = 106 \text{ mM}$ ) using 0.001 mol% of G2 catalyst in benzotrifluoride at 25 °C in every minute from 1 minute (bottom) to 10 minutes (top).

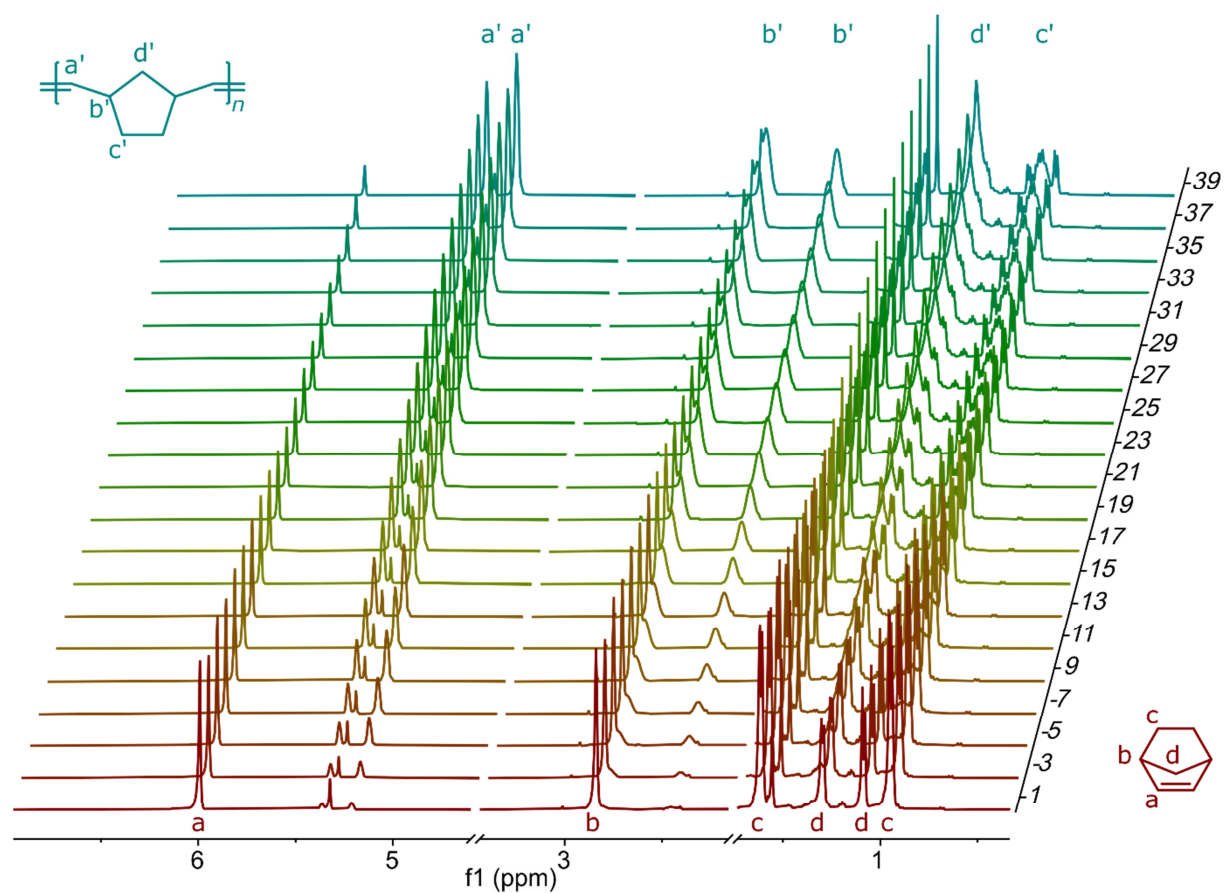

**Figure S3.** Stacked  $^1\text{H}$  NMR spectra of the ROMP of norbornene ( $c_0 = 106$  mM) using 0.001 mol% of G2 catalyst in  $\text{CD}_2\text{Cl}_2$  at 25  $^\circ\text{C}$  in every two minutes from 1 minute (bottom) to 39 minutes (top).

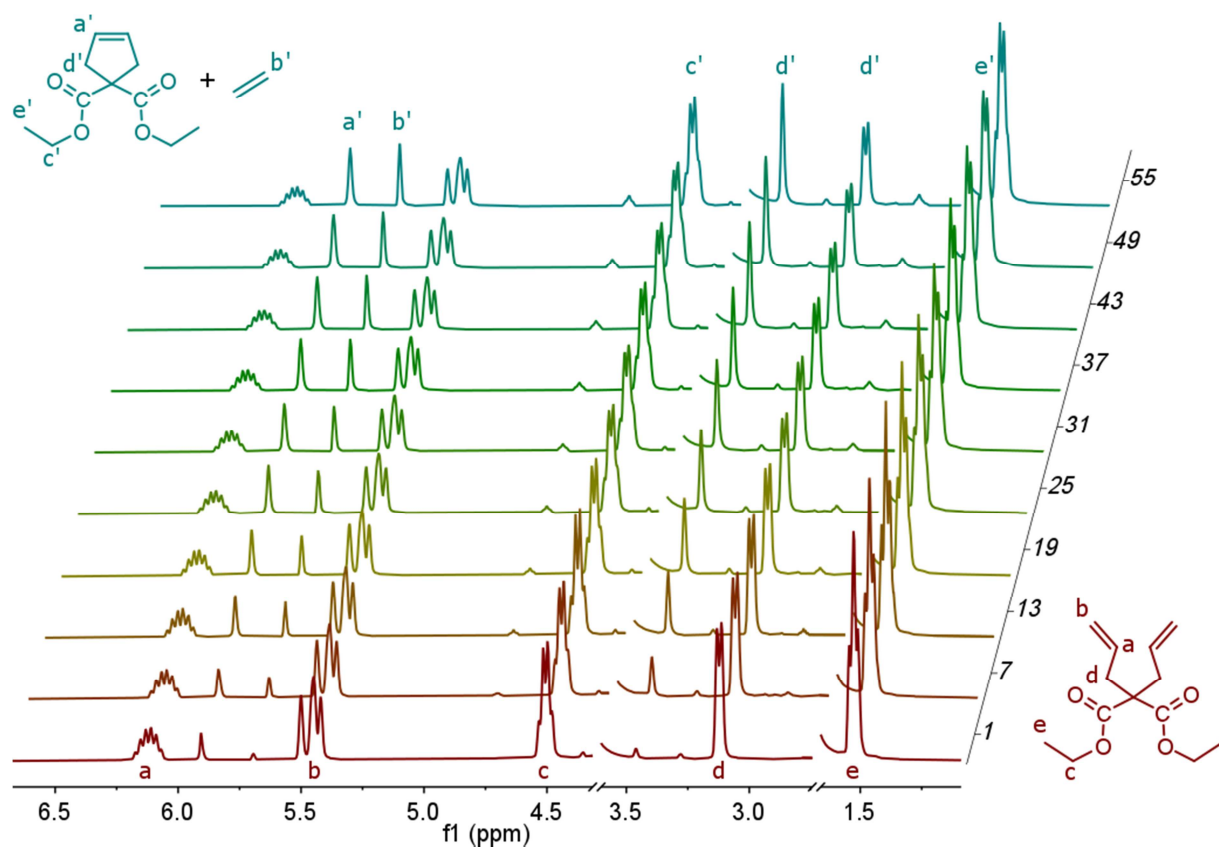

**Figure S4.** Stacked  $^1\text{H}$  NMR spectra of the RCM reaction of diethyl diallylmalonate ( $c_0 = 35.6$  mM) using 1 mol% G2 catalyst in benzotrifluoride at 25  $^\circ\text{C}$  in every six minutes from 1 minute (bottom) to 55 minutes.

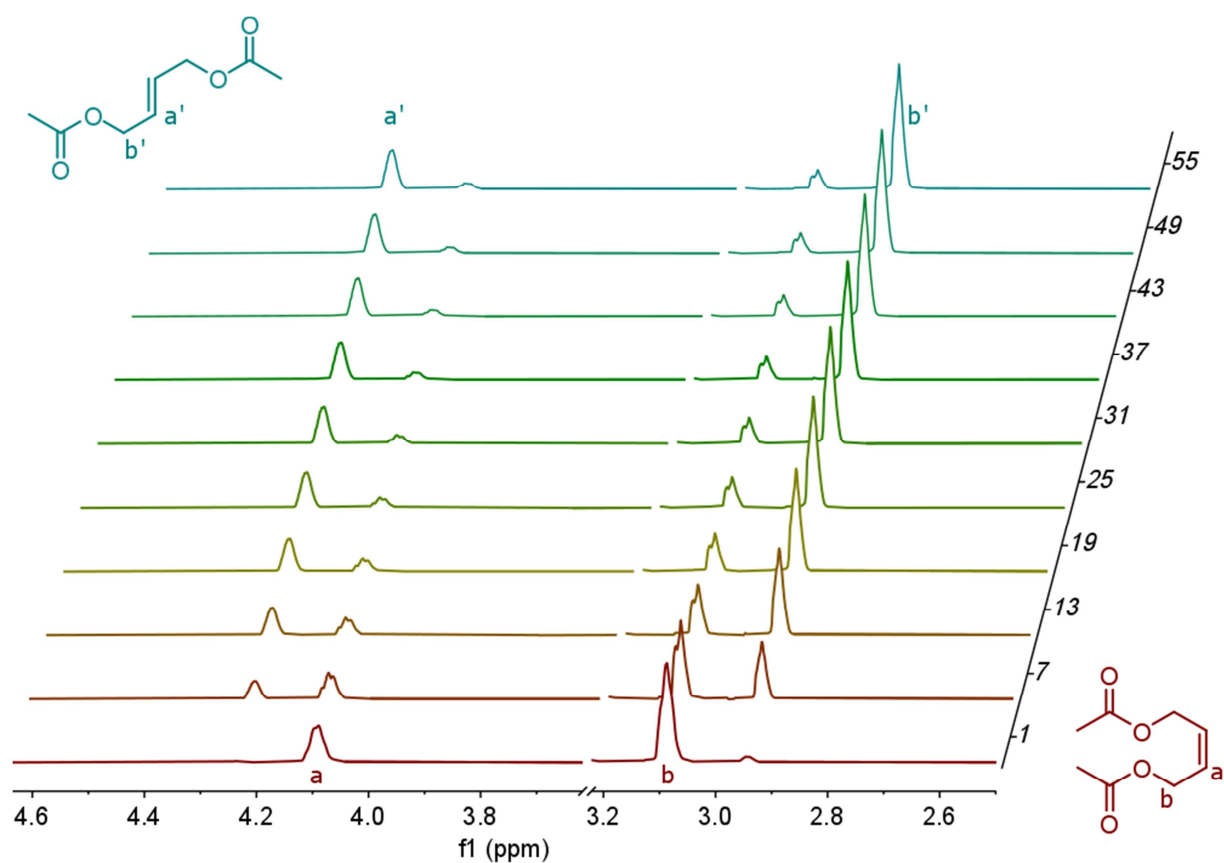

**Figure S5.** Stacked  $^1\text{H}$  NMR spectra of isomerization reaction of (Z)-but-2-ene-1,4-diyl diacetate ( $c_0 = 55.2$  mM) using 0.001 equivalent of G2 catalyst in benzonitrile in every six minutes from 1 minute (bottom) to 55 minutes (top).

**Table S1.** The solvent, the atmosphere, the catalyst type, the conversion and the turnover number for ROMP of norbornene ( $c_0 = 106 \text{ mM}$ ) conducted in benzotrifluoride at various conditions using 2 ppm catalyst at room temperature for 78 hours.

| Solvent       | Atmosphere | Catalyst | Conversion* | Turnover number* |
|---------------|------------|----------|-------------|------------------|
| Distilled BTF | Nitrogen   | G1       | 0.77        | 385,100          |
| Crude BTF     | Nitrogen   | G1       | 0.39        | 197,300          |
| Crude BTF     | Air        | G1       | 0.15        | 75,300           |
|               |            |          |             |                  |
| Distilled BTF | Nitrogen   | G2       | >0.99       | 499,900          |
| Crude BTF     | Nitrogen   | G2       | 0.95        | 474,300          |
| Crude BTF     | Air        | G2       | 0.19        | 94,300           |
|               |            |          |             |                  |
| Distilled BTF | Nitrogen   | HG2      | 0.96        | 481,200          |
| Crude BTF     | Nitrogen   | HG2      | 0.70        | 352,300          |
| Crude BTF     | Air        | HG2      | 0.33        | 162,600          |

\*Determined by  $^1\text{H}$  NMR measurements using anisole as internal standard.
